# Supplementary material
Source: publisher figshare collection journal article supplement (https://acs.figshare.com/ndownloader/files/4088323)
Supplement: Supplementary file 1 [file 4088323]

---

## Supporting Information

### A Rational Design for Dye-Sensitizer: Density Functional Theory Study on the Electronic Absorption Spectra of 5 Organoimido-Substituted Hexamolybdates

Jing Wang, Sha Cong, Shizheng Wen, Likai Yan\* and Zhongmin Su

Institute of Functional Material Chemistry, Department of Chemistry, Northeast Normal

University, Changchun 130024, P.R. China Fax: +86-431-5684009 E-mail:

yanlk924@nenu.edu.cn; zmsu@nenu.edu.cn

10

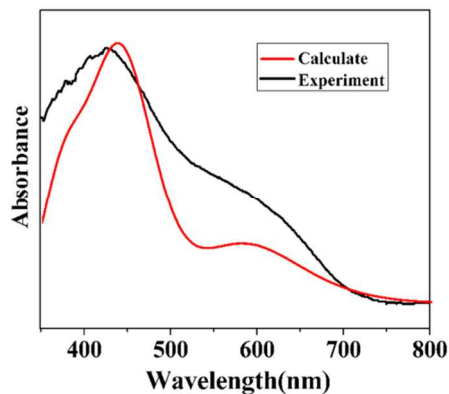

**Figure.** Experimental and calculated absorption spectra of system **1**.

The comparison between the calculated and experimental absorption spectra of system **1** is important to ensure the theoretical method is accurate in predicting the electronic absorption spectra of designed systems. The Figure shows that the calculated absorption spectra (red line) of system **1** by SAOP is in good agreement with the experimental result of  $\alpha$  type crystal (black line) and the difference of maximum absorption band between them is only 13 nm.<sup>22</sup> Therefore, the credible electronic absorption spectra of systems can be obtained by SAOP.
